# Supplementary material for: Cation-cation clusters in ionic liquids: Cooperative hydrogen bonding overcomes like-charge repulsion
Source: PubMed Central journal article supplement (PMC4667241; doi:10.1038/srep17505), 2015-12-02
Supplement: srep17505-s1.pdf [file srep17505-s1.pdf]

# Cation-cation clusters in ionic liquids: Cooperative hydrogen bonding overcomes like-charge repulsion\*

Anne Knorr and Ralf Ludwig<sup>a,b</sup>

<sup>a</sup>Dipl.-Chem. Anne Knorr, Prof. Dr. R. Ludwig  
Universität Rostock, Institut für Chemie, Abteilung für Physikalische Chemie  
Dr.-Lorenz-Weg 1, 18059, Rostock (Germany)  
Tel: (+49) 381-498-6517  
E-mail: [ralf.ludwig@uni-rostock.de](mailto:ralf.ludwig@uni-rostock.de)

<sup>b</sup>Prof. Dr. R. Ludwig  
Leibniz-Institut für Katalyse  
an der Universität Rostock e.V.  
Albert-Einstein-Str. 29a, 18059 Rostock (Germany)

## Supplementary Information

### Contents

- SI0** Sample preparation
- SI1** Experimental
- SI2** Deconvoluted mid infrared (MIR) spectra of [HEMim][BF<sub>4</sub>] between 233 K and 413 K
- SI3** Intensities of the deconvoluted vibrational bands of the MIR spectra of [HEMim][BF<sub>4</sub>] between 233 K and 413 K
- SI4** DFT-D3 optimized geometries of [HEMim][BF<sub>4</sub>] clusters ca and cc
- SI5** DFT-D3 calculated frequencies of [HEMim][BF<sub>4</sub>] clusters ca and cc
- SI6** DFT-D3 calculated energies, free energies and NBO analysis of [HEMim][BF<sub>4</sub>] clusters ca and cc

## **SI0 Sample preparation**

The sample of [HEMim][BF<sub>4</sub>] was purchased from Iolitec (>99% mass fraction). The ionic liquids were dried under vacuum for around 48 hours in order to reduce the water content under 100 ppm and remove other volatile impurities as well. The water content was checked using a Karl Fischer titrator (Titroline KF Trace, Schott Instruments GmbH) resulting in 64 ppm.

## **SI1 Experimental**

Mid infrared (MIR) measurements were performed with a Bruker Vector 22 FTIR spectrometer. An L.O.T.-Oriel variable-temperature cell equipped with CaF<sub>2</sub> windows having a path length of 12 μm was used for the variable-temperature experiments between 233 and 413 K. Cooling of the cell is achieved by means of a cooling dewar with liquid ethanol/nitrogen mixture. For each spectrum 128 scans were recorded at a spectral resolution of 1 cm<sup>-1</sup>.

The spectra were deconvoluted simultaneously as well as separately into a number of Voigt-profiles (convolution of Lorentzian and Gaussian functions) following the Levenberg-Marquardt procedure. The Voigt-profile has four parameters: the intensity, the frequency, the half-width of the Lorentzian, and the half-width of the Gaussian.

## SI2a Deconvoluted mid infrared (MIR) spectra of [HEMim][BF<sub>4</sub>] between 233 K and 413 K

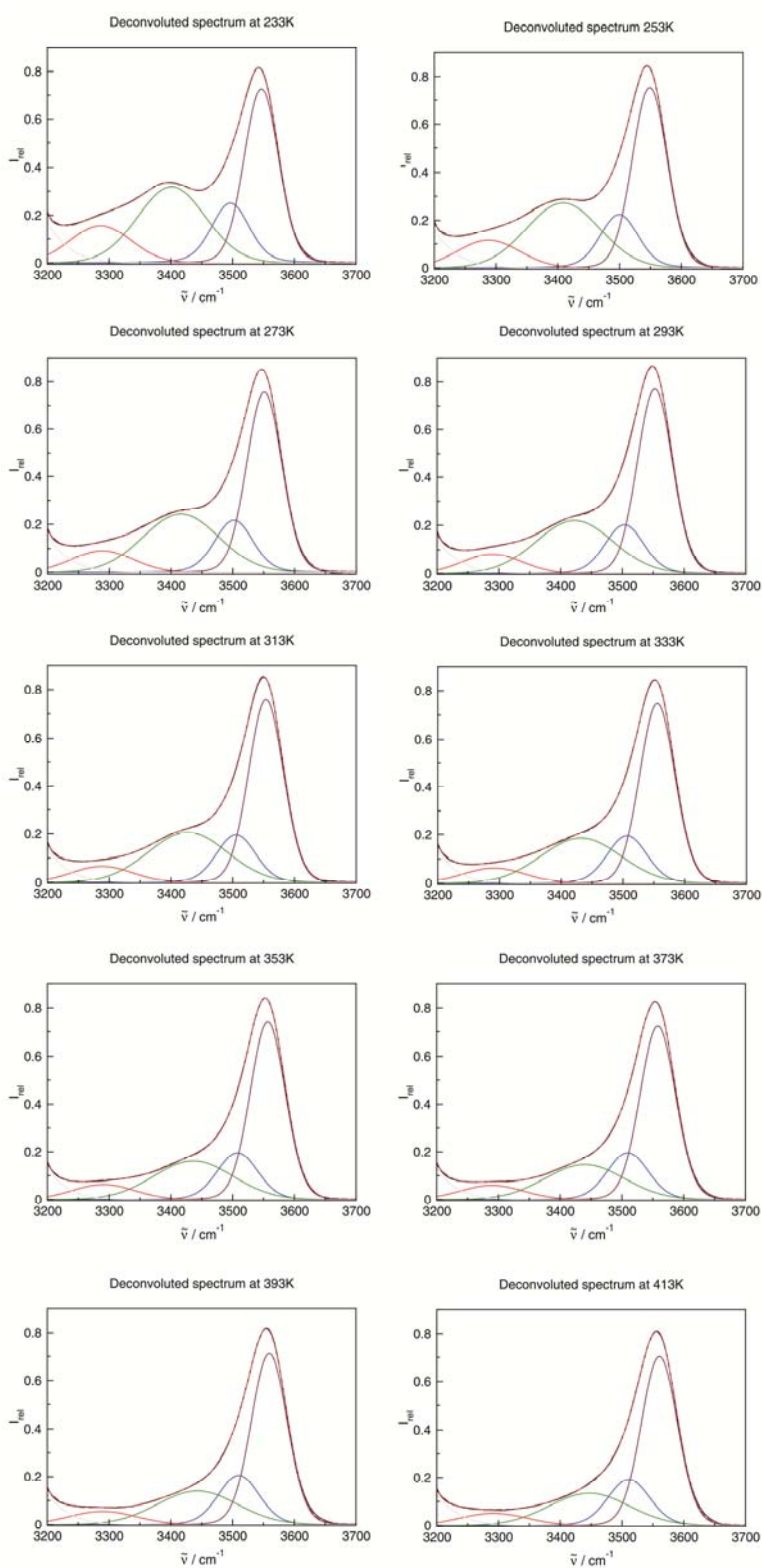

**SI-FIG1a** Deconvoluted MIR spectra of [HEMim][BF<sub>4</sub>] as a function of temperature. The spectra are shown for the frequency range between 3200 and 3700 cm<sup>-1</sup>.

## SI2a Derivatives of the mid infrared (MIR) spectrum of [HEMim][BF<sub>4</sub>] at 233 K

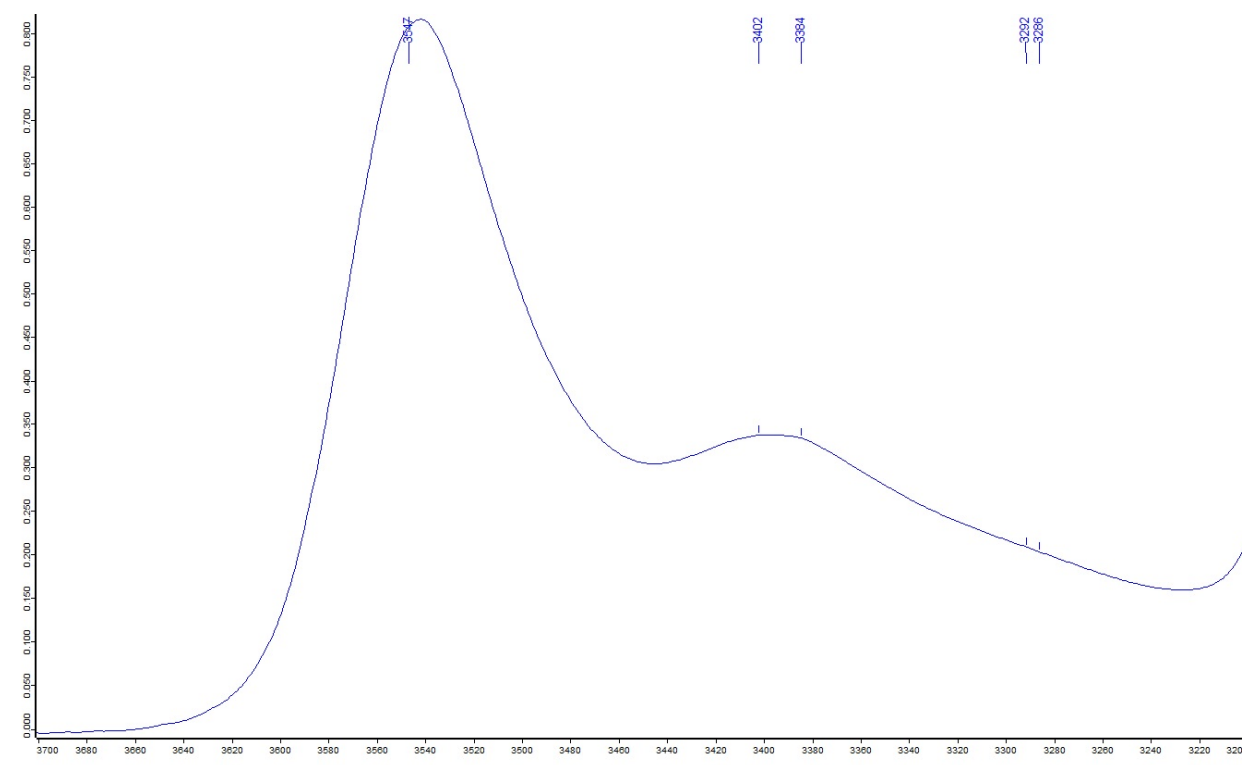

**SI-FIG1b** Derivatives of the MIR spectrum of [HEMim][BF<sub>4</sub>] at 233 K. The derived frequencies are located at the positions where we find the **ca** structure and the **cc** linear trimers, tetramers and cyclic tetramer.

**SI3 Intensities of the vibrational bands deconvoluted from the mid infrared (MIR) spectra of [HEMim][BF<sub>4</sub>] between 233 K and 413 K**

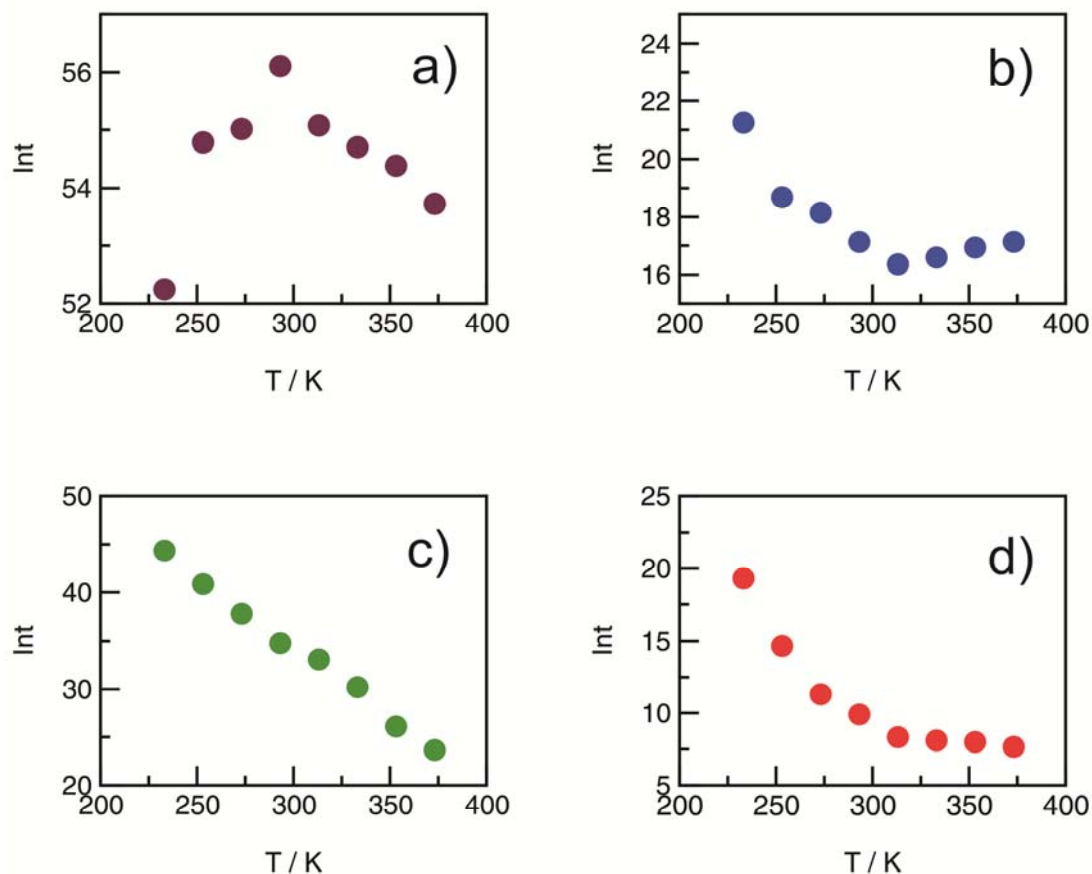

**SI-FIG2** Intensities of the vibrational bands deconvoluted from the MIR spectra of [HEMim][BF<sub>4</sub>] as a function of temperature. a) ca, b) dimer cc, c) trimer, tetramer cc, and d) tetramer cyc.

All spectra were deconvoluted separately into a number of Voigt profiles (convolution of Lorentzian and Gaussian functions) following the Levenberg-Marquardt procedure. The Voigt profile has four parameters: the intensity, the frequency, the half-width of the Lorentzian, and the half-width of the Gaussian. The frequency and the half-widths of each Voigt function for all vibrational modes were kept fixed in the simultaneous fitting procedure.

## SI4 DFT-D3 optimized geometries of [HEMim][BF<sub>4</sub>] clusters ca and cc

The IL clusters have been calculated at the DFT level B3LYP, using the internal stored 6-31+G\* basis set of the Gaussian 09 program.[24] Grimme's DFT-D3 method was applied for calculating dispersion forces.[25,26]

### Literature

- [24] Gaussian 03, Revision C.02, M. J. Frisch, G. W. Trucks, H. B. Schlegel, G. E. Scuseria, M. A. Robb, J. R. Cheeseman, J. A. Montgomery, Jr., T. Vreven, K. N. Kudin, J. C. Burant, J. M. Millam, S. S. Iyengar, J. Tomasi, V. Barone, B. Mennucci, M. Cossi, G. Scalmani, N. Rega, G. A. Petersson, H. Nakatsuji, M. Hada, M. Ehara, K. Toyota, R. Fukuda, J. Hasegawa, M. Ishida, T. Nakajima, Y. Honda, O. Kitao, H. Nakai, M. Klene, X. Li, J. E. Knox, H. P. Hratchian, J. B. Cross, V. Bakken, C. Adamo, J. Jaramillo, R. Gomperts, R. E. Stratmann, O. Yazyev, A. J. Austin, R. Cammi, C. Pomelli, J. W. Ochterski, P. Y. Ayala, K. Morokuma, G. A. Voth, P. Salvador, J. J. Dannenberg, V. G. Zakrzewski, S. Dapprich, A. D. Daniels, M. C. Strain, O. Farkas, D. K. Malick, A. D. Rabuck, K. Raghavachari, J. B. Foresman, J. V. Ortiz, Q. Cui, A. G. Baboul, S. Clifford, J. Cioslowski, B. B. Stefanov, G. Liu, A. Liashenko, P. Piskorz, I. Komaromi, R. L. Martin, D. J. Fox, T. Keith, M. A. Al-Laham, C. Y. Peng, A. Nanayakkara, M. Challacombe, P. M. W. Gill, B. Johnson, W. Chen, M. W. Wong, C. Gonzalez, and J. A. Pople, Gaussian, Inc., Wallingford CT, 2004.
- [25] S. Grimme, J. Antony, S. Ehrlich, H. Krieg, *J. Chem. Phys.* **2010**, 132, 154104.
- [26] S. Ehrlich, J. Moellmann, W. Reckien, T. Bredow, S. Grimme, *ChemPhysChem.* **2011**, 12, 3414-3420.

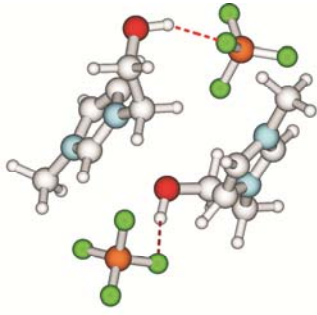

dimer-ca

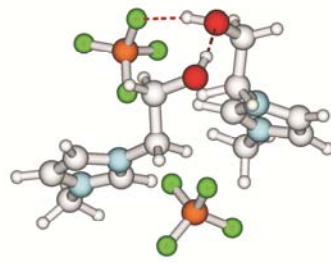

dimer-cc

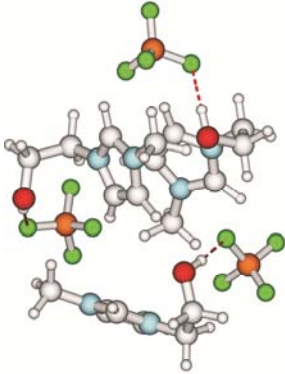

trimer-ca

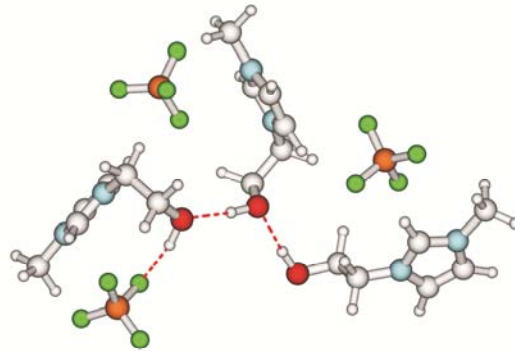

trimer-cc

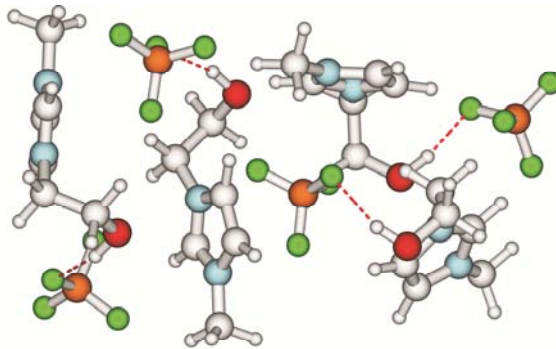

tetramer-ca

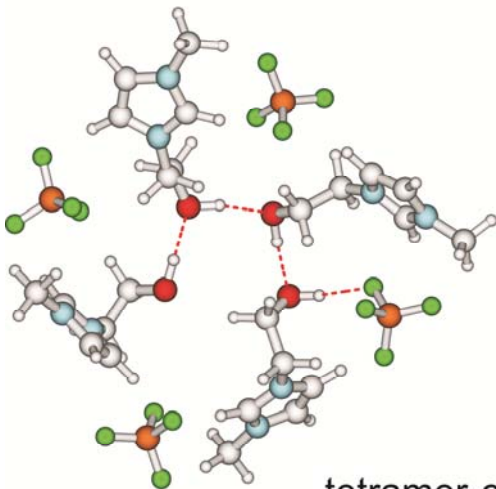

tetramer-cc

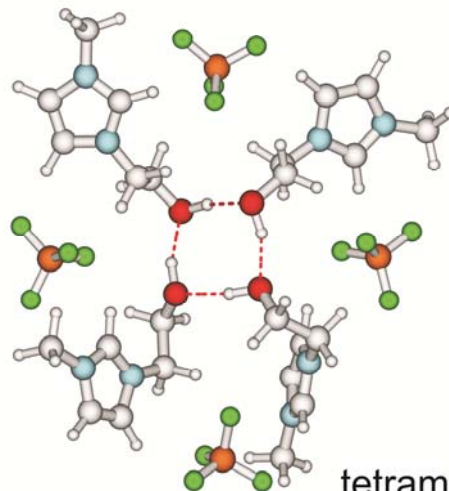

tetramer-cc-cyc

**dimer ca**

\*\*\* imOH\_BF4\_b3lyp\_6-3l+Gp\_dimer\_D3.g09, -1689.04027659

|   |   |           |           |           |
|---|---|-----------|-----------|-----------|
| 7 | 0 | -0.537230 | 2.319948  | -0.849060 |
| 6 | 0 | 0.079166  | 2.495557  | 0.378231  |
| 6 | 0 | -0.912544 | 2.535375  | 1.313038  |
| 7 | 0 | -2.116215 | 2.375168  | 0.644149  |
| 6 | 0 | -1.861669 | 2.239428  | -0.660930 |
| 6 | 0 | -3.445624 | 2.364704  | 1.264570  |
| 6 | 0 | 0.153948  | 2.190193  | -2.143103 |
| 6 | 0 | 0.471964  | 0.736349  | -2.516030 |
| 9 | 0 | -3.396662 | -0.575774 | 0.785971  |
| 5 | 0 | -3.434495 | -0.673529 | -0.651724 |
| 9 | 0 | -4.179467 | 0.420674  | -1.145587 |
| 9 | 0 | -2.091476 | -0.547555 | -1.110951 |
| 9 | 0 | -3.962621 | -1.893346 | -1.025618 |
| 9 | 0 | 3.063705  | 1.887146  | -0.557436 |
| 5 | 0 | 3.664061  | 1.276807  | 0.610635  |
| 9 | 0 | 4.605071  | 2.117429  | 1.155981  |
| 9 | 0 | 4.213600  | 0.036264  | 0.207973  |
| 9 | 0 | 2.601133  | 1.015687  | 1.527377  |
| 6 | 0 | 1.839458  | -1.829425 | 0.462156  |
| 7 | 0 | 0.510647  | -1.835911 | 0.598695  |
| 6 | 0 | -0.031927 | -2.712530 | -0.323312 |
| 6 | 0 | 1.013750  | -3.251248 | -1.013232 |
| 7 | 0 | 2.173859  | -2.687739 | -0.505817 |
| 6 | 0 | -0.233465 | -0.942558 | 1.494133  |
| 6 | 0 | -0.991614 | -1.707895 | 2.581816  |
| 6 | 0 | 3.531223  | -2.903695 | -1.006543 |
| 1 | 0 | -0.481997 | 2.643849  | -2.909662 |
| 1 | 0 | 1.072707  | 2.777098  | -2.063693 |
| 1 | 0 | -3.462103 | 1.608232  | 2.049623  |
| 1 | 0 | -3.658887 | 3.356107  | 1.672803  |
| 1 | 0 | -4.180338 | 2.085988  | 0.510694  |
| 1 | 0 | -2.604360 | 2.033660  | -1.415881 |
| 1 | 0 | -0.867805 | 2.654890  | 2.384243  |
| 1 | 0 | 1.152987  | 2.533363  | 0.473610  |
| 1 | 0 | 3.855583  | -3.922107 | -0.775778 |
| 1 | 0 | 3.538433  | -2.745477 | -2.087637 |
| 1 | 0 | 4.194778  | -2.176246 | -0.538432 |
| 1 | 0 | 0.492315  | -0.249400 | 1.926880  |
| 1 | 0 | -0.930319 | -0.381831 | 0.871286  |
| 1 | 0 | 2.522700  | -1.182102 | 0.989228  |
| 1 | 0 | -1.096106 | -2.855575 | -0.405769 |
| 1 | 0 | 1.035111  | -3.970288 | -1.817122 |
| 1 | 0 | 0.954008  | 0.763122  | -3.507669 |
| 8 | 0 | 1.278180  | 0.084090  | -1.559758 |
| 1 | 0 | -0.450823 | 0.156199  | -2.590389 |
| 1 | 0 | -1.442228 | -0.963583 | 3.258327  |
| 8 | 0 | -1.960196 | -2.593838 | 2.056131  |
| 1 | 0 | -0.296218 | -2.317125 | 3.169473  |
| 1 | 0 | 2.051799  | 0.642068  | -1.337432 |
| 1 | 0 | -2.663904 | -2.059752 | 1.637846  |

**trimer ca**

\*\*\* imOH\_BF4\_b3lyp\_6-3l+Gp\_trimer\_D3.g09, E(RB3LYP) = -2533.58418824

|   |   |           |           |          |
|---|---|-----------|-----------|----------|
| 7 | 0 | -4.064985 | -0.332992 | 1.265784 |
|---|---|-----------|-----------|----------|



|   |   |           |           |           |
|---|---|-----------|-----------|-----------|
| 6 | 0 | -4.366573 | 0.087975  | -0.017134 |
| 6 | 0 | -4.046948 | 1.412308  | -0.093849 |
| 7 | 0 | -3.547021 | 1.777878  | 1.142664  |
| 6 | 0 | -3.561927 | 0.705278  | 1.944411  |
| 6 | 0 | -3.054134 | 3.110004  | 1.521251  |
| 6 | 0 | -4.252609 | -1.707117 | 1.766127  |
| 6 | 0 | -3.214995 | -2.093921 | 2.830115  |
| 9 | 0 | -1.200337 | -2.755119 | 0.086003  |
| 5 | 0 | -2.248965 | -3.423288 | -0.648734 |
| 9 | 0 | -2.988475 | -4.198180 | 0.246152  |
| 9 | 0 | -1.657500 | -4.185156 | -1.662266 |
| 9 | 0 | -3.072199 | -2.414932 | -1.213638 |
| 1 | 0 | -5.264795 | -1.795689 | 2.177426  |
| 1 | 0 | -4.169918 | -2.362936 | 0.900640  |
| 1 | 0 | -3.045794 | 3.738437  | 0.632533  |
| 1 | 0 | -3.713438 | 3.541050  | 2.278875  |
| 1 | 0 | -2.031650 | 3.035507  | 1.897062  |
| 1 | 0 | -3.194620 | 0.679716  | 2.956888  |
| 1 | 0 | -4.059579 | 2.100315  | -0.925503 |
| 1 | 0 | -4.720804 | -0.604723 | -0.763467 |
| 1 | 0 | -3.308542 | -3.177619 | 2.984089  |
| 8 | 0 | -1.897777 | -1.716386 | 2.485450  |
| 1 | 0 | -3.433877 | -1.602517 | 3.785725  |
| 1 | 0 | -1.628022 | -2.167531 | 1.654516  |
| 7 | 0 | 1.490873  | -1.824402 | -2.014285 |
| 6 | 0 | 1.902852  | -0.500537 | -2.015113 |
| 6 | 0 | 0.842193  | 0.241347  | -2.449100 |
| 7 | 0 | -0.200100 | -0.640459 | -2.689371 |
| 6 | 0 | 0.216195  | -1.881712 | -2.420506 |
| 6 | 0 | -1.536874 | -0.278767 | -3.172868 |
| 6 | 0 | 2.282186  | -2.980378 | -1.567080 |
| 6 | 0 | 2.111410  | -3.256104 | -0.068341 |
| 9 | 0 | -0.390233 | 3.189987  | -2.661729 |
| 5 | 0 | -1.471528 | 3.187293  | -1.776210 |
| 9 | 0 | -2.695580 | 3.045759  | -2.439037 |
| 9 | 0 | -1.315286 | 2.085618  | -0.872322 |
| 9 | 0 | -1.473989 | 4.378244  | -0.996579 |
| 9 | 0 | 4.770713  | -1.318589 | -0.506558 |
| 5 | 0 | 5.291716  | -0.053712 | -0.051899 |
| 9 | 0 | 6.558584  | 0.154176  | -0.542443 |
| 9 | 0 | 5.264380  | -0.068410 | 1.368223  |
| 9 | 0 | 4.384710  | 0.953274  | -0.501779 |
| 6 | 0 | 2.584576  | 1.050780  | 1.832497  |
| 7 | 0 | 1.602320  | 1.587662  | 1.099321  |
| 6 | 0 | 0.417752  | 0.934061  | 1.398354  |
| 6 | 0 | 0.711803  | -0.014583 | 2.333115  |
| 7 | 0 | 2.067941  | 0.080371  | 2.592515  |
| 6 | 0 | 1.770575  | 2.721726  | 0.180761  |
| 6 | 0 | 1.443265  | 4.055000  | 0.862378  |
| 6 | 0 | 2.837700  | -0.806854 | 3.466567  |
| 1 | 0 | 1.960241  | -3.851188 | -2.146188 |
| 1 | 0 | 3.325924  | -2.763694 | -1.804612 |
| 1 | 0 | -1.905102 | 0.559873  | -2.583587 |
| 1 | 0 | -1.478991 | 0.008696  | -4.225703 |
| 1 | 0 | -2.196099 | -1.136956 | -3.040327 |
| 1 | 0 | -0.383754 | -2.778318 | -2.481422 |
| 1 | 0 | 0.717762  | 1.301513  | -2.606186 |
| 1 | 0 | 2.892411  | -0.211067 | -1.691986 |
| 1 | 0 | 2.580287  | -0.608911 | 4.510622  |
| 1 | 0 | 2.605461  | -1.837173 | 3.194305  |
| 1 | 0 | 3.899110  | -0.627111 | 3.292318  |
| 1 | 0 | 2.803258  | 2.698717  | -0.177433 |
| 1 | 0 | 1.101295  | 2.559812  | -0.663768 |
| 1 | 0 | 3.631201  | 1.300292  | 1.766780  |

|   |   |           |           |          |
|---|---|-----------|-----------|----------|
| 1 | 0 | -0.496665 | 1.186975  | 0.889926 |
| 1 | 0 | 0.081046  | -0.757215 | 2.797012 |
| 1 | 0 | 2.701921  | -4.156385 | 0.166449 |
| 8 | 0 | 2.493878  | -2.156891 | 0.736933 |
| 1 | 0 | 1.061096  | -3.458498 | 0.155613 |
| 1 | 0 | 1.692191  | 4.863691  | 0.160144 |
| 8 | 0 | 0.091077  | 4.131250  | 1.284345 |
| 1 | 0 | 2.062804  | 4.179183  | 1.757502 |
| 1 | 0 | 3.401187  | -1.885907 | 0.485405 |
| 1 | 0 | -0.464044 | 4.286925  | 0.494585 |

## tetramer ca

\*\*\* imOH\_BF4\_b3lyp\_6-3l+Gp\_tetramer\_D3.g09, E(RB3LYP) = -3378.11575625

|   |   |          |           |           |
|---|---|----------|-----------|-----------|
| 7 | 0 | 5.957772 | -0.794729 | 0.751501  |
| 6 | 0 | 6.212942 | -0.176621 | -0.460819 |
| 6 | 0 | 6.231346 | -1.159585 | -1.405661 |
| 7 | 0 | 5.980658 | -2.359129 | -0.758375 |
| 6 | 0 | 5.808439 | -2.109700 | 0.543591  |
| 6 | 0 | 5.933334 | -3.679231 | -1.394365 |
| 6 | 0 | 5.806651 | -0.104670 | 2.043320  |
| 6 | 0 | 4.393552 | 0.455038  | 2.256973  |
| 9 | 0 | 2.995800 | -3.162769 | -1.284385 |
| 5 | 0 | 2.731328 | -3.254876 | 0.128969  |
| 9 | 0 | 3.629475 | -4.168190 | 0.700410  |
| 9 | 0 | 2.934716 | -1.973312 | 0.683700  |
| 9 | 0 | 1.399025 | -3.652173 | 0.297071  |
| 9 | 0 | 6.011063 | 2.929302  | 0.357727  |
| 5 | 0 | 5.573146 | 3.560442  | -0.870368 |
| 9 | 0 | 6.603844 | 4.285997  | -1.421564 |
| 9 | 0 | 4.448088 | 4.361730  | -0.569648 |
| 9 | 0 | 5.154025 | 2.509032  | -1.741601 |
| 6 | 0 | 2.195904 | 2.375681  | -0.765900 |
| 7 | 0 | 2.019899 | 1.053219  | -0.858265 |
| 6 | 0 | 1.164873 | 0.643575  | 0.151059  |
| 6 | 0 | 0.807610 | 1.761046  | 0.844937  |
| 7 | 0 | 1.463270 | 2.829155  | 0.256791  |
| 6 | 0 | 2.764845 | 0.191708  | -1.780486 |
| 6 | 0 | 1.861516 | -0.504667 | -2.798164 |
| 6 | 0 | 1.437300 | 4.216333  | 0.720727  |
| 1 | 0 | 6.058364 | -0.816470 | 2.835329  |
| 1 | 0 | 6.546269 | 0.701064  | 2.054315  |
| 1 | 0 | 5.249396 | -3.635409 | -2.242138 |
| 1 | 0 | 6.938919 | -3.960159 | -1.718435 |
| 1 | 0 | 5.540366 | -4.398710 | -0.677586 |
| 1 | 0 | 5.531266 | -2.844271 | 1.283108  |
| 1 | 0 | 6.397214 | -1.110398 | -2.470455 |
| 1 | 0 | 6.325500 | 0.893209  | -0.543056 |
| 1 | 0 | 0.512065 | 4.703098  | 0.399334  |
| 1 | 0 | 1.494438 | 4.220243  | 1.811226  |
| 1 | 0 | 2.304819 | 4.737044  | 0.313310  |
| 1 | 0 | 3.503369 | 0.824042  | -2.279433 |
| 1 | 0 | 3.295352 | -0.545290 | -1.176317 |
| 1 | 0 | 2.881401 | 2.963737  | -1.355126 |
| 1 | 0 | 0.924277 | -0.390555 | 0.319746  |
| 1 | 0 | 0.165661 | 1.875960  | 1.704652  |
| 1 | 0 | 4.388301 | 0.945372  | 3.244247  |
| 8 | 0 | 3.998569 | 1.333134  | 1.228389  |
| 1 | 0 | 3.662541 | -0.357145 | 2.268188  |
| 1 | 0 | 2.500135 | -0.950925 | -3.574803 |
| 8 | 0 | 1.022136 | -1.489318 | -2.207510 |
| 1 | 0 | 1.201051 | 0.223079  | -3.281994 |

|   |   |           |           |           |
|---|---|-----------|-----------|-----------|
| 1 | 0 | 4.676094  | 2.025410  | 1.081383  |
| 1 | 0 | 1.595602  | -2.231450 | -1.929223 |
| 7 | 0 | -2.416142 | -2.000209 | -0.997043 |
| 6 | 0 | -3.653124 | -2.274386 | -0.442454 |
| 6 | 0 | -3.417455 | -2.939246 | 0.725498  |
| 7 | 0 | -2.045656 | -3.056814 | 0.865758  |
| 6 | 0 | -1.461204 | -2.473673 | -0.184641 |
| 6 | 0 | -1.353946 | -3.664740 | 2.007707  |
| 6 | 0 | -2.174625 | -1.245452 | -2.235896 |
| 6 | 0 | -2.185493 | 0.270841  | -2.013007 |
| 9 | 0 | -2.394627 | -0.875434 | 3.353879  |
| 5 | 0 | -1.441950 | -0.140280 | 2.581980  |
| 9 | 0 | -0.220073 | -0.818342 | 2.556099  |
| 9 | 0 | -1.936387 | -0.011049 | 1.262727  |
| 9 | 0 | -1.302800 | 1.147730  | 3.142437  |
| 9 | 0 | -5.288562 | -0.734299 | -2.954985 |
| 5 | 0 | -6.611486 | -0.597688 | -2.398083 |
| 9 | 0 | -7.508266 | -1.382181 | -3.082883 |
| 9 | 0 | -6.956096 | 0.777534  | -2.441191 |
| 9 | 0 | -6.520457 | -0.983903 | -1.023836 |
| 6 | 0 | -5.603862 | 1.747310  | 0.082294  |
| 7 | 0 | -4.908051 | 1.363722  | 1.156968  |
| 6 | 0 | -3.918727 | 2.298848  | 1.408340  |
| 6 | 0 | -4.048651 | 3.268021  | 0.458099  |
| 7 | 0 | -5.108407 | 2.907236  | -0.357491 |
| 6 | 0 | -5.111632 | 0.089842  | 1.861187  |
| 6 | 0 | -5.478102 | 0.280469  | 3.334501  |
| 6 | 0 | -5.511978 | 3.576763  | -1.593100 |
| 1 | 0 | -1.198096 | -1.550269 | -2.616820 |
| 1 | 0 | -2.952929 | -1.535606 | -2.946290 |
| 1 | 0 | -1.580441 | -3.082118 | 2.901518  |
| 1 | 0 | -1.693666 | -4.697896 | 2.117312  |
| 1 | 0 | -0.282486 | -3.642988 | 1.817360  |
| 1 | 0 | -0.397913 | -2.405934 | -0.349992 |
| 1 | 0 | -4.096841 | -3.326942 | 1.468083  |
| 1 | 0 | -4.573660 | -1.959560 | -0.911536 |
| 1 | 0 | -5.841164 | 4.595361  | -1.371366 |
| 1 | 0 | -4.659671 | 3.593619  | -2.276998 |
| 1 | 0 | -6.320028 | 3.006151  | -2.051458 |
| 1 | 0 | -5.901779 | -0.444846 | 1.326911  |
| 1 | 0 | -4.184841 | -0.475481 | 1.766190  |
| 1 | 0 | -6.392366 | 1.184857  | -0.392391 |
| 1 | 0 | -3.221461 | 2.179068  | 2.220854  |
| 1 | 0 | -3.481200 | 4.168758  | 0.284323  |
| 1 | 0 | -1.837175 | 0.732334  | -2.952944 |
| 8 | 0 | -3.448593 | 0.782721  | -1.629494 |
| 1 | 0 | -1.485350 | 0.534871  | -1.215303 |
| 1 | 0 | -5.702633 | -0.715209 | 3.749096  |
| 8 | 0 | -4.471281 | 0.943035  | 4.076866  |
| 1 | 0 | -6.381428 | 0.893415  | 3.424923  |
| 1 | 0 | -4.137572 | 0.392802  | -2.205997 |
| 1 | 0 | -3.670905 | 0.384335  | 4.082781  |

**dimer cc**

\*\*\* imOH\_BF4\_cation\_cation\_b3lyp\_6-31+Gp\_dimer\_D3.g09, E(RB3LYP) = -1689.03077609

|   |   |           |           |           |
|---|---|-----------|-----------|-----------|
| 6 | 0 | 0.661378  | -3.831511 | -0.936789 |
| 6 | 0 | -0.205805 | -3.091176 | -1.682808 |
| 7 | 0 | -0.599404 | -2.021456 | -0.898186 |
| 6 | 0 | 0.012666  | -2.107397 | 0.286650  |
| 7 | 0 | 0.777986  | -3.201704 | 0.290184  |

|   |   |           |           |           |
|---|---|-----------|-----------|-----------|
| 6 | 0 | -1.402857 | -0.871893 | -1.318061 |
| 6 | 0 | -2.899534 | -1.169905 | -1.497565 |
| 8 | 0 | -3.611299 | 0.067730  | -1.497458 |
| 6 | 0 | 1.737561  | -3.544597 | 1.340480  |
| 9 | 0 | -2.839695 | 0.841067  | 1.062326  |
| 5 | 0 | -2.476290 | -0.137043 | 2.077163  |
| 9 | 0 | -2.730395 | -1.414351 | 1.540804  |
| 9 | 0 | -1.072920 | -0.007463 | 2.281446  |
| 9 | 0 | -3.179143 | 0.105535  | 3.234614  |
| 8 | 0 | -2.410707 | 2.397951  | -2.669753 |
| 6 | 0 | -1.737183 | 2.837716  | -1.503548 |
| 6 | 0 | -0.242950 | 2.502440  | -1.646063 |
| 7 | 0 | 0.515219  | 2.595114  | -0.380891 |
| 6 | 0 | 0.038845  | 2.335858  | 0.894814  |
| 6 | 0 | 1.120946  | 2.281362  | 1.720145  |
| 7 | 0 | 2.241439  | 2.502569  | 0.942785  |
| 6 | 0 | 1.851693  | 2.672853  | -0.323621 |
| 6 | 0 | 3.626221  | 2.401864  | 1.406396  |
| 9 | 0 | 3.749402  | 0.456090  | -0.861953 |
| 5 | 0 | 2.726031  | -0.475675 | -0.599073 |
| 9 | 0 | 3.091450  | -1.770955 | -0.985665 |
| 9 | 0 | 1.550981  | -0.075589 | -1.300465 |
| 9 | 0 | 2.433450  | -0.468357 | 0.795768  |
| 1 | 0 | -0.556121 | -3.215655 | -2.695321 |
| 1 | 0 | -0.088428 | -1.394123 | 1.092866  |
| 1 | 0 | -1.288622 | -0.119819 | -0.539434 |
| 1 | 0 | -0.960461 | -0.483636 | -2.237975 |
| 1 | 0 | -3.099882 | -1.648712 | -2.461188 |
| 1 | 0 | -3.249670 | -1.819912 | -0.690694 |
| 1 | 0 | -3.646381 | 0.369847  | -0.566104 |
| 1 | 0 | -2.895647 | 1.575752  | -2.442917 |
| 1 | 0 | -1.874158 | 3.921271  | -1.401404 |
| 1 | 0 | -2.157982 | 2.361633  | -0.613152 |
| 1 | 0 | -0.123323 | 1.481773  | -2.008420 |
| 1 | 0 | 0.229215  | 3.173466  | -2.368465 |
| 1 | 0 | 2.513030  | 2.761981  | -1.170144 |
| 1 | 0 | -1.001574 | 2.165066  | 1.113224  |
| 1 | 0 | 1.184359  | 2.067026  | 2.774891  |
| 1 | 0 | 3.823594  | 1.361792  | 1.670007  |
| 1 | 0 | 4.293579  | 2.690788  | 0.595248  |
| 1 | 0 | 3.765482  | 3.063539  | 2.264576  |
| 1 | 0 | 1.714978  | -4.623485 | 1.508921  |
| 1 | 0 | 2.728472  | -3.214482 | 1.022107  |
| 1 | 0 | 1.454899  | -3.022963 | 2.255356  |
| 1 | 0 | 1.221250  | -4.722133 | -1.174027 |

### trimer cc

\*\*\* imOH\_BF4\_cation\_cation\_b3lyp\_6-31+Gp\_trimer\_D3.g09, E(RB3LYP) = -2533.55624132

|   |   |           |           |           |
|---|---|-----------|-----------|-----------|
| 6 | 0 | -5.585765 | 0.961949  | -0.302834 |
| 7 | 0 | -4.689276 | -0.028361 | -0.194928 |
| 6 | 0 | -4.573977 | -0.383411 | 1.137490  |
| 6 | 0 | -5.436725 | 0.411900  | 1.831719  |
| 7 | 0 | -6.061912 | 1.239849  | 0.914199  |
| 6 | 0 | -3.868026 | -0.582323 | -1.284923 |
| 6 | 0 | -2.772240 | 0.398536  | -1.729217 |
| 8 | 0 | -2.046564 | 0.902319  | -0.613377 |
| 6 | 0 | -7.008587 | 2.307810  | 1.242909  |
| 9 | 0 | -2.195610 | -2.565982 | 1.384621  |
| 5 | 0 | -2.805441 | -3.640369 | 0.661759  |
| 9 | 0 | -2.498236 | -3.462043 | -0.716573 |

|   |   |           |           |           |
|---|---|-----------|-----------|-----------|
| 9 | 0 | -4.184654 | -3.599599 | 0.854284  |
| 9 | 0 | -2.238370 | -4.854902 | 1.102979  |
| 8 | 0 | 0.477507  | 0.471150  | 0.193863  |
| 6 | 0 | 0.240388  | -0.360835 | 1.330083  |
| 6 | 0 | 1.242686  | -1.511106 | 1.338681  |
| 7 | 0 | 1.053149  | -2.411625 | 0.193557  |
| 6 | 0 | 0.388980  | -3.572932 | 0.223134  |
| 7 | 0 | 0.377482  | -4.089881 | -1.008130 |
| 6 | 0 | 1.050446  | -3.223150 | -1.854391 |
| 6 | 0 | 1.476132  | -2.169621 | -1.100493 |
| 6 | 0 | -0.296665 | -5.326588 | -1.406957 |
| 8 | 0 | 1.738428  | 2.696851  | 1.178978  |
| 6 | 0 | 3.104073  | 2.368695  | 1.240799  |
| 6 | 0 | 3.818050  | 2.926679  | -0.006416 |
| 7 | 0 | 5.272088  | 2.691574  | 0.063499  |
| 6 | 0 | 6.129367  | 3.224898  | 1.010529  |
| 6 | 0 | 7.341583  | 2.623624  | 0.837814  |
| 7 | 0 | 7.206643  | 1.735300  | -0.214178 |
| 6 | 0 | 5.946207  | 1.791189  | -0.657086 |
| 6 | 0 | 8.206761  | 0.753336  | -0.644293 |
| 9 | 0 | 4.217561  | -2.241659 | 0.253760  |
| 5 | 0 | 4.798364  | -1.015419 | -0.057326 |
| 9 | 0 | 3.840524  | -0.194998 | -0.751187 |
| 9 | 0 | 5.926049  | -1.163886 | -0.897095 |
| 9 | 0 | 5.183127  | -0.322749 | 1.115214  |
| 9 | 0 | -3.474434 | 4.967013  | -1.197835 |
| 5 | 0 | -4.239479 | 3.857378  | -0.908904 |
| 9 | 0 | -3.541608 | 3.011624  | 0.047853  |
| 9 | 0 | -5.483761 | 4.187443  | -0.340433 |
| 9 | 0 | -4.465063 | 3.063787  | -2.070301 |
| 1 | 0 | -2.480930 | 1.735025  | -0.315988 |
| 1 | 0 | -4.524660 | -0.827649 | -2.125952 |
| 1 | 0 | -3.435912 | -1.508746 | -0.911060 |
| 1 | 0 | -2.073794 | -0.151719 | -2.369467 |
| 1 | 0 | -3.198399 | 1.229382  | -2.298449 |
| 1 | 0 | -0.399830 | 0.687367  | -0.208450 |
| 1 | 0 | -0.781461 | -0.749966 | 1.311912  |
| 1 | 0 | 0.382770  | 0.216767  | 2.255174  |
| 1 | 0 | 2.270379  | -1.147780 | 1.291335  |
| 1 | 0 | 1.124268  | -2.104925 | 2.248905  |
| 1 | 0 | 1.254884  | 1.962465  | 0.730988  |
| 1 | 0 | 3.287225  | 1.289903  | 1.299182  |
| 1 | 0 | 3.523615  | 2.834394  | 2.142444  |
| 1 | 0 | 3.641503  | 4.001937  | -0.095788 |
| 1 | 0 | 3.446499  | 2.424796  | -0.900991 |
| 1 | 0 | -0.113788 | -3.995302 | 1.078811  |
| 1 | 0 | 1.175862  | -3.439979 | -2.903560 |
| 1 | 0 | 2.066414  | -1.299672 | -1.336397 |
| 1 | 0 | 5.805492  | 3.978420  | 1.711049  |
| 1 | 0 | 8.276254  | 2.747123  | 1.362333  |
| 1 | 0 | 5.523026  | 1.161731  | -1.422613 |
| 1 | 0 | -3.912380 | -1.175904 | 1.453498  |
| 1 | 0 | -5.665067 | 0.458245  | 2.884890  |
| 1 | 0 | -5.816903 | 1.505565  | -1.206082 |
| 1 | 0 | 7.985128  | 0.443745  | -1.665009 |
| 1 | 0 | 9.195136  | 1.214893  | -0.598128 |
| 1 | 0 | 8.147227  | -0.121914 | 0.005231  |
| 1 | 0 | -7.451180 | 2.685659  | 0.322764  |
| 1 | 0 | -7.781934 | 1.902967  | 1.900181  |
| 1 | 0 | -6.471665 | 3.128057  | 1.721498  |
| 1 | 0 | -1.037351 | -5.091462 | -2.172951 |
| 1 | 0 | 0.443557  | -6.036670 | -1.785369 |
| 1 | 0 | -0.819230 | -5.733602 | -0.542335 |

**tetramer cc**

\*\*\* imOH\_BF4\_cation\_cation\_b3lyp\_6-31+Gp\_tetramer\_1\_D3.g09, E(RB3LYP) = -  
3378.10686835

|   |   |           |           |           |
|---|---|-----------|-----------|-----------|
| 6 | 0 | 3.375127  | 4.822319  | -0.243667 |
| 7 | 0 | 3.238869  | 3.479826  | 0.071855  |
| 6 | 0 | 4.434876  | 2.991169  | 0.420134  |
| 7 | 0 | 5.337828  | 3.975509  | 0.342540  |
| 6 | 0 | 4.692573  | 5.131395  | -0.069533 |
| 6 | 0 | 2.021850  | 2.664146  | -0.086616 |
| 6 | 0 | 1.744314  | 2.365880  | -1.571063 |
| 8 | 0 | 0.722161  | 1.384699  | -1.671094 |
| 6 | 0 | 6.763847  | 3.840066  | 0.647752  |
| 8 | 0 | 1.463272  | -1.225182 | -1.576939 |
| 6 | 0 | 2.237157  | -1.797734 | -0.531249 |
| 6 | 0 | 3.174882  | -2.865097 | -1.119108 |
| 7 | 0 | 3.772144  | -3.672863 | -0.039755 |
| 6 | 0 | 4.665224  | -3.229202 | 0.922698  |
| 6 | 0 | 4.843997  | -4.262017 | 1.795925  |
| 7 | 0 | 4.056401  | -5.314878 | 1.357730  |
| 6 | 0 | 3.418752  | -4.930807 | 0.246307  |
| 6 | 0 | 3.924803  | -6.624071 | 2.002301  |
| 8 | 0 | -1.862225 | 1.235709  | -0.757099 |
| 6 | 0 | -2.562653 | 2.150290  | -1.586661 |
| 6 | 0 | -3.844648 | 2.573603  | -0.877912 |
| 7 | 0 | -3.556742 | 3.169312  | 0.439494  |
| 6 | 0 | -2.989819 | 4.365089  | 0.640958  |
| 7 | 0 | -2.806160 | 4.533094  | 1.956153  |
| 6 | 0 | -3.264271 | 3.400903  | 2.611122  |
| 6 | 0 | -3.732687 | 2.543995  | 1.658496  |
| 6 | 0 | -2.197713 | 5.702780  | 2.596300  |
| 9 | 0 | -5.243987 | -0.208981 | 1.341537  |
| 5 | 0 | -6.365466 | 0.184626  | 0.517210  |
| 9 | 0 | -7.426001 | -0.696671 | 0.761430  |
| 9 | 0 | -5.943862 | 0.036349  | -0.835728 |
| 9 | 0 | -6.680369 | 1.511262  | 0.786897  |
| 8 | 0 | -0.834182 | -2.629955 | -1.115252 |
| 6 | 0 | -1.379374 | -2.026639 | 0.059726  |
| 6 | 0 | -2.389172 | -2.928202 | 0.772669  |
| 7 | 0 | -3.482600 | -3.342075 | -0.118642 |
| 6 | 0 | -4.639212 | -2.682293 | -0.258486 |
| 7 | 0 | -5.367651 | -3.297165 | -1.195954 |
| 6 | 0 | -4.646004 | -4.380147 | -1.675072 |
| 6 | 0 | -3.460938 | -4.409245 | -0.999536 |
| 6 | 0 | -6.694308 | -2.869433 | -1.658404 |
| 9 | 0 | 4.403878  | 0.489103  | -1.422278 |
| 5 | 0 | 5.482836  | 0.035874  | -0.637864 |
| 9 | 0 | 5.903417  | -1.232860 | -1.056004 |
| 9 | 0 | 5.004788  | -0.064141 | 0.722927  |
| 9 | 0 | 6.532393  | 0.967222  | -0.662982 |
| 9 | 0 | -1.167287 | -5.933750 | 0.507735  |
| 5 | 0 | 0.188337  | -5.592213 | 0.482390  |
| 9 | 0 | 0.475221  | -4.614106 | 1.454756  |
| 9 | 0 | 0.484238  | -4.998333 | -0.805161 |
| 9 | 0 | 1.013089  | -6.714251 | 0.646754  |
| 9 | 0 | -0.463124 | 4.694162  | -1.223192 |
| 5 | 0 | -0.111110 | 5.817368  | -0.436924 |
| 9 | 0 | -1.242087 | 6.651500  | -0.286217 |
| 9 | 0 | 0.301645  | 5.348161  | 0.841915  |
| 9 | 0 | 0.945434  | 6.516307  | -1.042148 |
| 1 | 0 | -0.910925 | 1.299939  | -1.000090 |

|   |   |           |           |           |
|---|---|-----------|-----------|-----------|
| 1 | 0 | -4.392572 | 3.308622  | -1.475089 |
| 1 | 0 | -4.499263 | 1.721103  | -0.706536 |
| 1 | 0 | -2.854120 | 1.684955  | -2.541689 |
| 1 | 0 | -1.941040 | 3.026444  | -1.804636 |
| 1 | 0 | -0.411277 | -3.490507 | -0.908208 |
| 1 | 0 | -1.842628 | -1.091166 | -0.266385 |
| 1 | 0 | -0.590207 | -1.786258 | 0.786824  |
| 1 | 0 | -1.914681 | -3.834915 | 1.150156  |
| 1 | 0 | -2.832788 | -2.386020 | 1.612722  |
| 1 | 0 | 0.597330  | -1.699246 | -1.611037 |
| 1 | 0 | 1.595177  | -2.261828 | 0.228679  |
| 1 | 0 | 2.825694  | -1.003567 | -0.065668 |
| 1 | 0 | 3.978651  | -2.403294 | -1.693467 |
| 1 | 0 | 2.604075  | -3.546672 | -1.752976 |
| 1 | 0 | 1.112663  | 0.477814  | -1.652841 |
| 1 | 0 | 1.382899  | 3.270282  | -2.066639 |
| 1 | 0 | 2.663178  | 2.016776  | -2.054665 |
| 1 | 0 | 2.191760  | 1.728514  | 0.451899  |
| 1 | 0 | 1.188132  | 3.205010  | 0.364544  |
| 1 | 0 | -4.920883 | -1.799607 | 0.299402  |
| 1 | 0 | -5.041295 | -5.031401 | -2.438955 |
| 1 | 0 | -2.626615 | -5.092318 | -1.034070 |
| 1 | 0 | 5.081915  | -2.234454 | 0.891213  |
| 1 | 0 | 5.455599  | -4.340756 | 2.681232  |
| 1 | 0 | 2.708001  | -5.525151 | -0.304284 |
| 1 | 0 | 4.639189  | 1.967957  | 0.697472  |
| 1 | 0 | 5.221557  | 6.062475  | -0.201070 |
| 1 | 0 | 2.535320  | 5.432455  | -0.547631 |
| 1 | 0 | -4.193605 | 1.570170  | 1.729979  |
| 1 | 0 | -3.227288 | 3.313952  | 3.685724  |
| 1 | 0 | -2.689044 | 5.069624  | -0.119531 |
| 1 | 0 | 3.033480  | -7.115286 | 1.612117  |
| 1 | 0 | 4.816168  | -7.225893 | 1.805042  |
| 1 | 0 | 3.807365  | -6.474784 | 3.077793  |
| 1 | 0 | 7.336937  | 4.376861  | -0.111233 |
| 1 | 0 | 6.974201  | 4.258225  | 1.636166  |
| 1 | 0 | 7.028201  | 2.783295  | 0.607787  |
| 1 | 0 | -2.014027 | 6.462403  | 1.838544  |
| 1 | 0 | -2.877297 | 6.079247  | 3.365173  |
| 1 | 0 | -1.240068 | 5.414933  | 3.034399  |
| 1 | 0 | -6.591922 | -2.328296 | -2.601864 |
| 1 | 0 | -7.316658 | -3.756604 | -1.794650 |
| 1 | 0 | -7.135195 | -2.208026 | -0.913261 |

### tetramer cc\_cyc

\*\*\* imOH\_BF4\_cation\_cation\_b3lyp\_6-31+Gp\_tetramer\_D3.g09, E(RB3LYP) = -3378.11423979

|   |   |           |           |           |
|---|---|-----------|-----------|-----------|
| 6 | 0 | -3.142778 | 3.321540  | 0.143202  |
| 7 | 0 | -3.977421 | 2.392172  | -0.341968 |
| 6 | 0 | -5.279505 | 2.758963  | -0.042073 |
| 6 | 0 | -5.210077 | 3.942325  | 0.629066  |
| 7 | 0 | -3.869314 | 4.276034  | 0.734239  |
| 6 | 0 | -3.605389 | 1.158480  | -1.064034 |
| 6 | 0 | -2.164001 | 1.160890  | -1.535842 |
| 8 | 0 | -1.318939 | 1.095798  | -0.387532 |
| 6 | 0 | -3.335193 | 5.506473  | 1.324291  |
| 9 | 0 | -5.101429 | -0.397462 | 1.344496  |
| 5 | 0 | -6.420761 | -0.381544 | 0.798506  |
| 9 | 0 | -6.296830 | -0.196792 | -0.612844 |
| 9 | 0 | -7.162840 | 0.658950  | 1.345480  |
| 9 | 0 | -7.021599 | -1.639275 | 1.042938  |

|   |   |           |           |           |
|---|---|-----------|-----------|-----------|
| 8 | 0 | -1.028569 | -1.290581 | 0.812209  |
| 6 | 0 | -1.966099 | -1.594068 | 1.842243  |
| 6 | 0 | -2.497342 | -3.010062 | 1.629732  |
| 7 | 0 | -3.205342 | -3.122665 | 0.345247  |
| 6 | 0 | -4.531608 | -3.034450 | 0.184676  |
| 7 | 0 | -4.808850 | -3.091411 | -1.121603 |
| 6 | 0 | -3.615291 | -3.216597 | -1.818219 |
| 6 | 0 | -2.607970 | -3.236545 | -0.898544 |
| 6 | 0 | -6.146903 | -3.018139 | -1.714851 |
| 8 | 0 | 1.607958  | -0.777006 | 1.139046  |
| 6 | 0 | 2.577351  | -1.821023 | 1.087844  |
| 6 | 0 | 2.925462  | -2.120166 | -0.380475 |
| 7 | 0 | 3.810732  | -3.293920 | -0.465338 |
| 6 | 0 | 5.154845  | -3.340761 | -0.129711 |
| 6 | 0 | 5.528301  | -4.652067 | -0.204073 |
| 7 | 0 | 4.406910  | -5.379869 | -0.575500 |
| 6 | 0 | 3.384071  | -4.532418 | -0.730652 |
| 6 | 0 | 4.318724  | -6.830309 | -0.758043 |
| 8 | 0 | 1.284684  | 0.929757  | -0.931183 |
| 6 | 0 | 2.237139  | 1.985644  | -0.962994 |
| 6 | 0 | 2.202346  | 2.763020  | 0.362723  |
| 7 | 0 | 3.256739  | 3.791375  | 0.366544  |
| 6 | 0 | 4.511694  | 3.569074  | 0.772294  |
| 7 | 0 | 5.251537  | 4.644239  | 0.479934  |
| 6 | 0 | 4.436369  | 5.587071  | -0.129659 |
| 6 | 0 | 3.183490  | 5.050205  | -0.208949 |
| 6 | 0 | 6.685802  | 4.766210  | 0.750664  |
| 9 | 0 | 4.693476  | 0.630545  | 1.185499  |
| 5 | 0 | 5.791053  | 0.363612  | 0.308287  |
| 9 | 0 | 6.515066  | -0.738914 | 0.793708  |
| 9 | 0 | 6.608365  | 1.515204  | 0.258445  |
| 9 | 0 | 5.271491  | 0.072713  | -0.969931 |
| 9 | 0 | -1.109344 | -5.620537 | 0.321529  |
| 5 | 0 | 0.222769  | -5.212707 | 0.227745  |
| 9 | 0 | 0.372742  | -4.339720 | -0.909777 |
| 9 | 0 | 1.091681  | -6.311013 | 0.043207  |
| 9 | 0 | 0.598549  | -4.485010 | 1.377325  |
| 9 | 0 | 0.517250  | 5.918122  | -1.522721 |
| 5 | 0 | -0.469118 | 5.034518  | -1.058857 |
| 9 | 0 | -0.310467 | 4.859878  | 0.357701  |
| 9 | 0 | -1.759475 | 5.520516  | -1.310232 |
| 9 | 0 | -0.304506 | 3.760543  | -1.657534 |
| 1 | 0 | -0.370128 | 1.216430  | -0.664071 |
| 1 | 0 | -4.285052 | 1.071688  | -1.914837 |
| 1 | 0 | -3.802647 | 0.319457  | -0.394580 |
| 1 | 0 | -2.019531 | 0.277901  | -2.175171 |
| 1 | 0 | -1.930423 | 2.059131  | -2.120014 |
| 1 | 0 | -1.233897 | -0.410395 | 0.404377  |
| 1 | 0 | -2.793020 | -0.875120 | 1.840811  |
| 1 | 0 | -1.471374 | -1.559929 | 2.822535  |
| 1 | 0 | -1.682924 | -3.735169 | 1.619023  |
| 1 | 0 | -3.201747 | -3.276078 | 2.422637  |
| 1 | 0 | 0.692755  | -1.151703 | 1.102988  |
| 1 | 0 | 2.191904  | -2.727599 | 1.566415  |
| 1 | 0 | 3.463903  | -1.463803 | 1.617671  |
| 1 | 0 | 3.438419  | -1.275960 | -0.843898 |
| 1 | 0 | 2.016076  | -2.359697 | -0.935756 |
| 1 | 0 | 1.522374  | 0.297935  | -0.203655 |
| 1 | 0 | 1.954299  | 2.641908  | -1.789135 |
| 1 | 0 | 3.244585  | 1.584989  | -1.134224 |
| 1 | 0 | 2.398261  | 2.086341  | 1.198043  |
| 1 | 0 | 1.242426  | 3.259992  | 0.503358  |
| 1 | 0 | -5.261205 | -2.883717 | 0.965012  |
| 1 | 0 | -3.592933 | -3.300971 | -2.893516 |



|   |   |           |           |           |
|---|---|-----------|-----------|-----------|
| 1 | 0 | -1.541271 | -3.355422 | -1.004650 |
| 1 | 0 | 5.710189  | -2.448862 | 0.131894  |
| 1 | 0 | 6.481241  | -5.125598 | -0.025656 |
| 1 | 0 | 2.373280  | -4.799164 | -0.995750 |
| 1 | 0 | 4.865836  | 2.649314  | 1.212841  |
| 1 | 0 | 4.815798  | 6.544033  | -0.452746 |
| 1 | 0 | 2.260910  | 5.437868  | -0.622587 |
| 1 | 0 | -6.116780 | 2.126358  | -0.290173 |
| 1 | 0 | -5.986633 | 4.561870  | 1.049414  |
| 1 | 0 | -2.068813 | 3.304079  | 0.072595  |
| 1 | 0 | 3.266326  | -7.117611 | -0.723378 |
| 1 | 0 | 4.762515  | -7.115189 | -1.716013 |
| 1 | 0 | 4.852554  | -7.322133 | 0.058063  |
| 1 | 0 | 7.165292  | 5.246855  | -0.104705 |
| 1 | 0 | 6.848340  | 5.364989  | 1.651174  |
| 1 | 0 | 7.097712  | 3.763542  | 0.875594  |
| 1 | 0 | -2.250704 | 5.426908  | 1.381136  |
| 1 | 0 | -3.589545 | 6.352081  | 0.681567  |
| 1 | 0 | -3.765828 | 5.636677  | 2.320166  |
| 1 | 0 | -6.197294 | -2.149393 | -2.373125 |
| 1 | 0 | -6.344126 | -3.938874 | -2.270167 |
| 1 | 0 | -6.874655 | -2.882261 | -0.916381 |

**SI5 DFT-D3 calculated frequencies of the [HEMim][BF<sub>4</sub>] clusters ca and cc**

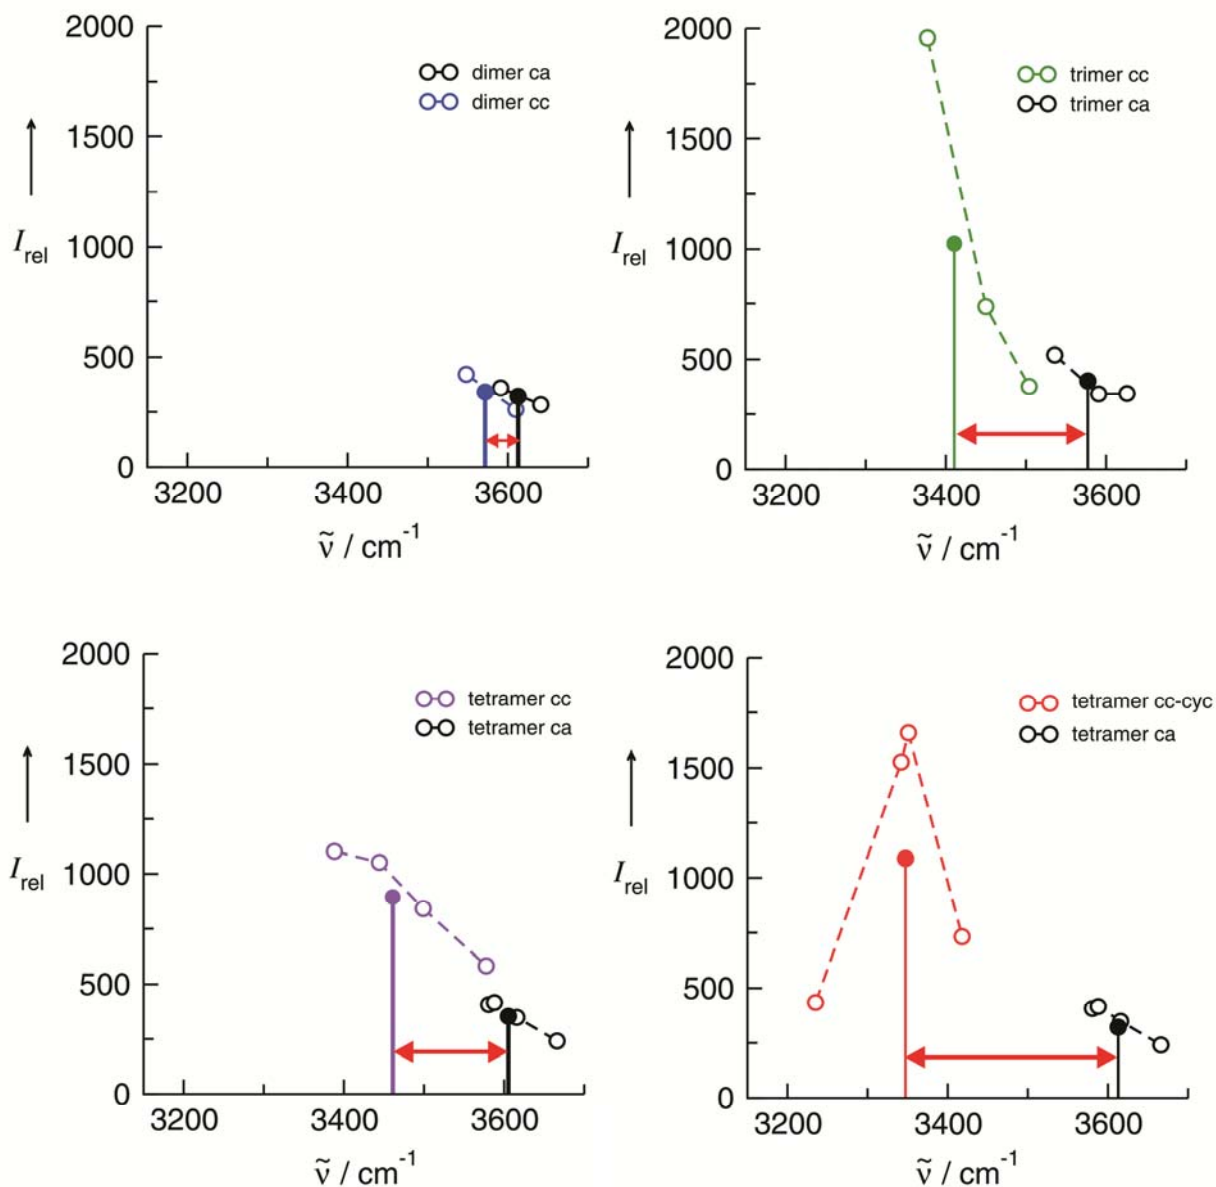

**SI-FIG3** DFT-D3 calculated frequencies and intensities of the OH stretches in the dimer cc (blue), the trimer cc (green), the tetramer cc (purple) and the tetramer cc-cyc (red) compared to the corresponding values of the ca clusters n=2-4 (black). The average values for each cluster ca and cc are given by the filled symbols.

## SI6 DFT-D3 calculated energies, free energies and NBO analysis of [HEMim][BF<sub>4</sub>] clusters ca and cc

*SI Table 1.* Total energies (in Hartrees) for clusters ca.

|          | <b>Dimer ca</b> | <b>Trimer ca</b> | <b>Tetramer ca</b> |
|----------|-----------------|------------------|--------------------|
| <b>E</b> | 1689.040276     | -2533.584188     | -3378.115756       |
| <b>G</b> | -1688.722107    | -2533.094097     | -3377.458682       |

*SI Table 2.* Total energies (in Hartrees) for clusters cc.

|          | <b>Dimer cc</b> | <b>Trimer cc</b> | <b>Tetramer cc</b> | <b>Tetramer cc-cyc</b> |
|----------|-----------------|------------------|--------------------|------------------------|
| <b>E</b> | -1689.030776    | -2533.556241     | -3378.106868       | -3378.114239           |
| <b>G</b> | -1688.713597    | -2533.075443     | -3377.454176       | -3377.458989           |

*SI Table 3.* Energy and free energy differences ca-cc per ion-pair (in kJ mol<sup>-1</sup>).

|           | <b>Dimer cc</b> | <b>Trimer cc</b> | <b>Tetramer cc</b> | <b>Tetramer cc-cyc</b> |
|-----------|-----------------|------------------|--------------------|------------------------|
| <b>ΔE</b> | +12.47          | +24.46           | +5.83              | +1.0                   |
| <b>ΔG</b> | +11.17          | +16.32           | +2.96              | +0.2                   |

## NBO Analysis

For the ion pairs the wavefunctions were analyzed by the natural bond orbital (NBO) method.<sup>[14,32]</sup> NBO analysis transforms the delocalized many-electron wavefunctions into optimized electron-pair bonding units, corresponding to the Lewis structure picture. Starting from a given input atomic orbital basis set, the program performs a transformation to form a set of high-occupancy Lewis-type (bond, lone pair) NBO's, each of which is taken to be doubly occupied. This represents the "natural Lewis structure" of the molecule. Delocalization effects, which appear as weak departures from the idealized localized picture, are reflected as nonzero occupancies of non-Lewis (antibond or Rydberg) NBO's. The total non-Lewis occupancy (1NL) constitutes a quantitative measure of electronic delocalization. The results of NBO analysis allow many of the quantitative trends in ion-pair structures, stability, and spectroscopic properties to be rationalized in terms of charge-transfer delocalization between ions or molecules.

**SI Table 4.** NBO-Analysis of the IL clusters n=1-4.

| Donor NBO (i) |          | /Acceptor NBO (j) |                | kcal /mol  | a. u. | a. u. |       |
|---------------|----------|-------------------|----------------|------------|-------|-------|-------|
| =====         |          |                   |                |            |       |       |       |
| dimer ca      |          |                   |                |            |       |       |       |
| =====         |          |                   |                |            |       |       |       |
| 82.           | LP (1) F | 9                 | /576. BD*(1) O | 47 - H 50  | 2.63  | 1.37  | 0.054 |
| 84.           | LP (3) F | 9                 | /576. BD*(1) O | 47 - H 50  | 10.00 | 0.89  | 0.085 |
| 94.           | LP (1) F | 14                | /575. BD*(1) O | 44 - H 49  | 2.37  | 1.34  | 0.051 |
| 96.           | LP (3) F | 14                | /575. BD*(1) O | 44 - H 49  | 14.27 | 0.90  | 0.102 |
| trimer ca     |          |                   |                |            |       |       |       |
| =====         |          |                   |                |            |       |       |       |
| 122.          | LP (1) F | 9                 | /812. BD*(1) O | 23 - H 25  | 3.81  | 1.34  | 0.064 |
| 124.          | LP (3) F | 9                 | /812. BD*(1) O | 23 - H 25  | 17.48 | 0.92  | 0.114 |
| 146.          | LP (1) F | 38                | /864. BD*(1) O | 72 - H 75  | 3.09  | 1.35  | 0.058 |
| 148.          | LP (3) F | 38                | /864. BD*(1) O | 72 - H 75  | 13.13 | 0.90  | 0.098 |
| 149.          | LP (1) F | 39                | /863. BD*(1) O | 69 - H 74  | 2.63  | 1.34  | 0.053 |
| 151.          | LP (3) F | 39                | /863. BD*(1) O | 69 - H 74  | 14.25 | 0.91  | 0.102 |
| tetramer ca   |          |                   |                |            |       |       |       |
| =====         |          |                   |                |            |       |       |       |
| 162.          | LP (1) F | 9                 | /***. BD*(1) O | 47 - H 50  | 2.47  | 1.37  | 0.052 |
| 164.          | LP (3) F | 9                 | /***. BD*(1) O | 47 - H 50  | 12.83 | 0.89  | 0.096 |
| 174.          | LP (1) F | 14                | /***. BD*(1) O | 44 - H 49  | 2.65  | 1.33  | 0.053 |
| 176.          | LP (3) F | 14                | /***. BD*(1) O | 44 - H 49  | 15.36 | 0.91  | 0.106 |
| 192.          | LP (1) F | 59                | /***. BD*(1) O | 97 - H 100 | 2.07  | 1.39  | 0.048 |
| 194.          | LP (3) F | 59                | /***. BD*(1) O | 97 - H 100 | 7.43  | 0.86  | 0.072 |
| 204.          | LP (1) F | 64                | /***. BD*(1) O | 94 - H 99  | 2.68  | 1.34  | 0.054 |

206. LP (3) F 64 /\*\*\*. BD\*(1) O 94 - H 99 14.82 0.91 0.104

dimer cc  
=====

82. LP (1) O 8 /552. BD\*(1) O 15 - H 36 3.31 1.02 0.052  
83. LP (2) O 8 /552. BD\*(1) O 15 - H 36 10.85 0.83 0.085

84. LP (1) F 10 /543. BD\*(1) O 8 - H 35 2.97 1.31 0.056  
86. LP (3) F 10 /543. BD\*(1) O 8 - H 35 8.81 0.85 0.078

trimer cc  
=====

122. LP (1) O 8 /814. BD\*(1) O 15 - H 48 2.80 0.87 0.044  
123. LP (2) O 8 /814. BD\*(1) O 15 - H 48 24.28 0.97 0.137

136. LP (1) O 15 /836. BD\*(1) O 24 - H 53 3.03 1.00 0.049  
137. LP (2) O 15 /836. BD\*(1) O 24 - H 53 20.43 0.84 0.118

157. LP (1) F 40 /805. BD\*(1) O 8 - H 43 4.21 1.27 0.066  
159. LP (3) F 40 /805. BD\*(1) O 8 - H 43 19.96 0.97 0.125

tetramer cc  
=====

162. LP (1) O 8 /\*\*\*. BD\*(1) O 19 - H 57 4.59 0.94 0.059  
163. LP (2) O 8 /\*\*\*. BD\*(1) O 19 - H 57 18.31 0.92 0.117

164. LP (1) O 10 /\*\*\*. BD\*(1) O 8 - H 72 3.93 0.98 0.056  
165. LP (2) O 10 /\*\*\*. BD\*(1) O 8 - H 72 21.65 0.88 0.124

182. LP (1) O 33 /\*\*\*. BD\*(1) O 10 - H 67 2.03 0.99 0.040  
183. LP (2) O 33 /\*\*\*. BD\*(1) O 10 - H 67 20.00 0.84 0.116

203. LP (1) F 50 /\*\*\*. BD\*(1) O 33 - H 62 2.89 1.35 0.056  
205. LP (3) F 50 /\*\*\*. BD\*(1) O 33 - H 62 15.84 0.90 0.107

tetramer cc\_cycl  
=====

162. LP (1) O 8 /\*\*\*. BD\*(1) O 15 - H 62 2.14 0.95 0.041  
163. LP (2) O 8 /\*\*\*. BD\*(1) O 15 - H 62 26.51 0.87 0.136

176. LP (1) O 15 /\*\*\*. BD\*(1) O 24 - H 67 3.48 0.97 0.052  
177. LP (2) O 15 /\*\*\*. BD\*(1) O 24 - H 67 21.06 0.85 0.120

179. LP (1) O 24 /\*\*\*. BD\*(1) O 33 - H 72 2.88 0.95 0.047  
180. LP (2) O 24 /\*\*\*. BD\*(1) O 33 - H 72 25.52 0.84 0.132

182. LP (1) O 33 /\*\*\*. BD\*(1) O 8 - H 57 3.21 0.92 0.049  
183. LP (2) O 33 /\*\*\*. BD\*(1) O 8 - H 57 26.29 0.86 0.135

[14]F. Weinhold, C. R. Landis, Valency and Bonding A Natural Bond Orbital Donor-Acceptor Perspective, Cambridge University Press, Cambridge, **2005**.

[32]A. E. Reed, L. A. Curtiss, F. Weinhold, Chem. Rev. **1988**, 88, 899-926.
